# Supplementary material for: ddRAD Sequencing Identifies Pesticide Resistance-Related Loci and Reveals New Insights into Genetic Structure of Bactericera cockerelli as a Plant Pathogen Vector
Source: MDPI journal article supplement (doi:10.3390/insects13030257), 2022-03-04
Supplement: s1 [file s1]

**Table S1. Pairwise comparison of genetic ( $F_{ST}$ ) among eight populations of potato psyllid based on 4294 independent loci.**

|                     | Colorado | New Mexico | TX LRGV | TX Panhandle | TX Pearsall | TX Weslaco | Western 1 | Western 2 |
|---------------------|----------|------------|---------|--------------|-------------|------------|-----------|-----------|
| <b>Colorado</b>     | 0.00     |            |         |              |             |            |           |           |
| <b>New Mexico</b>   | 0.33     | 0.00       |         |              |             |            |           |           |
| <b>TX LRGV</b>      | 0.49     | 0.28       | 0.00    |              |             |            |           |           |
| <b>TX Panhandle</b> | 0.49     | 0.45       | 0.59    | 0.00         |             |            |           |           |
| <b>TX Pearsall</b>  | 0.42     | 0.40       | 0.54    | 0.54         | 0.00        |            |           |           |
| <b>TX Weslaco</b>   | 0.50     | 0.47       | 0.55    | 0.59         | 0.56        | 0.00       |           |           |
| <b>Western 1</b>    | 0.55     | 0.50       | 0.59    | 0.62         | 0.50        | 0.13       | 0.00      |           |
| <b>Western 2</b>    | 0.21     | 0.19       | 0.32    | 0.36         | 0.24        | 0.40       | 0.46      | 0.00      |
